# Supplementary material
Source: PubMed Central journal article supplement (PMC6342283)
Supplement: NIHMS1000737-supplement-Supplement_Tables.pdf [file NIHMS1000737-supplement-Supplement_Tables.pdf]

1  
2  
3

## Online-Only Supplemental Table

|                                                                                                                         |          |
|-------------------------------------------------------------------------------------------------------------------------|----------|
| <b>eTable 1:</b> Reasons for withdrawal                                                                                 | <b>2</b> |
| <b>eTable 2:</b> Interactions Effects of Patient Characteristics on Advance Care Planning Documentation by Study Arm    | <b>3</b> |
| <b>eTable 3.</b> Effect Size Estimates of ACP Behavior Change and Actions Over Time and By English and Spanish-speakers | <b>4</b> |
| <b>eTable 4:</b> Ease-of-use and Satisfaction Between Study Arms and by English- and Spanish-speakers                   | <b>5</b> |
| <b>eTable 5:</b> Depression and Anxiety Scores Between Study Arms and by English- and Spanish-speakers                  | <b>6</b> |
| <b>Online-Only References</b>                                                                                           | <b>7</b> |

4

5 **eTable 1: Reasons for Withdrawal**

|                          | All Participants, n=986 |               |         | English-speakers, n=541 |               |         | Spanish-speakers, n=445 |               |         |
|--------------------------|-------------------------|---------------|---------|-------------------------|---------------|---------|-------------------------|---------------|---------|
| Reason                   | AD-only                 | PREPARE       | p-value | AD-only                 | PREPARE       | p-value | AD-only                 | PREPARE       | p-value |
|                          | n=33<br>n (%)           | n=56<br>n (%) |         | n=12<br>n (%)           | n=27<br>n (%) |         | n=21<br>n (%)           | n=29<br>n (%) |         |
| Lost Interest, No. (%)   | 6 (18.2)                | 12 (21.4)     | 0.04*   | 1 (8.4)                 | 5 (18.5)      | 0.12*   | 5 (23.8)                | 7 (24.1)      | 0.44*   |
| Too Sick, No. (%)        | 5 (15.1)                | 2 (3.6)       |         | 3 (25.0)                | 1 (3.7)       |         | 2 (9.5)                 | 1 (3.5)       |         |
| Study too long, No. (%)  | 3 (9.1)                 | 13 (23.2)     |         | 0 (0)                   | 4 (14.8)      |         | 3 (14.3)                | 9 (31.0)      |         |
| Study upsetting, No. (%) | 2 (6.1)                 | 12 (21.4)     |         | 1 (8.3)                 | 8 (29.7)      |         | 1 (4.8)                 | 4 (13.8)      |         |
| Too busy, No. (%)        | 5 (15.1)                | 6 (10.7)      |         | 3 (25.0)                | 3 (11.1)      |         | 2 (9.5)                 | 3 (10.3)      |         |
| Other, No. (%)           | 12 (36.4)               | 11 (19.7)     |         | 4 (33.3)                | 6 (22.2)      |         | 8 (38.1)                | 5 (17.3)      |         |

6  
7 \*Fisher's Exact Test. The p-value significance level was set at 0.05. Total withdrawals, n=89 (9.0%), 7.2% for English-speakers and  
8 11.0% for Spanish-speakers. The p-value significance level was set at < 0.05.  
9  
10  
11

12 **eTable 2: Interactions Effects of Patient Characteristics on Advance Care**  
 13 **Planning Documentation by Study Arm\***  
 14

| <b>ALL PARTICIPANTS</b>                   |                     | <b>AD-only<br/>n=505<br/>(%)</b> | <b>PREPARE<br/>n=481<br/>(%)</b> | <b>p-value</b>  |
|-------------------------------------------|---------------------|----------------------------------|----------------------------------|-----------------|
| Language                                  | English             | 38.1                             | 46.2                             | 0.21            |
|                                           | Spanish             | 25.6                             | 40.1                             |                 |
| Health literacy                           | Adequate            | 34.6                             | 45.2                             | 0.70            |
|                                           | Limited             | 29.6                             | 42.2                             |                 |
| Role in decision making                   | Makes own decisions | 32.7                             | 43.4                             | 0.71            |
|                                           | Doctor decides      | 31.2                             | 45.8                             |                 |
| Age                                       | < 65 years          | 28.6                             | 41.5                             | 0.27            |
|                                           | ≥65 years           | 39.9                             | 46.8                             |                 |
| Gender                                    | Women               | 29.0                             | 40.6                             | 0.66            |
|                                           | Men                 | 38.1                             | 47.8                             |                 |
| Race/ethnicity                            | White               | 31.3                             | 43.9                             | 0.42            |
|                                           | Non-white           | 35.0                             | 42.5                             |                 |
| Health status                             | Good-to-excellent   | 29.6                             | 38.5                             | 0.62            |
|                                           | Fair-to-poor        | 35.0                             | 47.7                             |                 |
| Potential surrogate                       | Yes                 | 31.9                             | 43.4                             | 0.69            |
|                                           | No                  | 43.9                             | 49.7                             |                 |
| Internet access at home                   | Yes                 | 35.2                             | 41.0                             | 0.08            |
|                                           | No                  | 29.6                             | 45.8                             |                 |
| <b>SPANISH-SPEAKING PARTICIPANTS ONLY</b> |                     | <b>AD-only<br/>n=226<br/>(%)</b> | <b>PREPARE<br/>n=219<br/>(%)</b> | <b>p-value*</b> |
| Doctor-patient language                   | Concordant          | 29.8                             | 38.7                             | 0.13            |
|                                           | Discordant          | 21.1                             | 44.0                             |                 |

15  
 16 \*Percentages represent stratified, adjusted analysis. Interactions were tested by adding  
 17 interaction terms to the group-by-time variable in adjusted mixed effects models. All  
 18 dichotomous interaction terms are defined in the protocol.<sup>1</sup> All models were adjusted for health  
 19 literacy, prior ACP documentation, and clustering by clinician; however, the health literacy  
 20 interaction model was only adjusted for prior ACP documentation and clustering by clinician.  
 21 The p-value significance level was set at < 0.05. All variables were assessed for interactions  
 22 among the total cohort, except doctor-patient language concordance which was assessed only  
 23 for Spanish-speaking participants.

24 **eTable 3. Effect Size Estimates\* of ACP Behavior Change and Actions Over Time and By English and Spanish-speakers**

|                            | <b>All Participants, n=986</b> |         | <b>English-speakers, n=541</b> |         | <b>Spanish-speakers, n=445</b> |         |
|----------------------------|--------------------------------|---------|--------------------------------|---------|--------------------------------|---------|
|                            | AD-only                        | PREPARE | AD-only                        | PREPARE | AD-only                        | PREPARE |
| <b>ACP Behavior Change</b> |                                |         |                                |         |                                |         |
| 1 week                     | 0.27                           | 0.58    | 0.34                           | 0.54    | 0.21                           | 0.70    |
| 3 months                   | 0.41                           | 0.73    | 0.43                           | 0.63    | 0.41                           | 0.93    |
| 6 months                   | 0.47                           | 0.82    | 0.48                           | 0.77    | 0.49                           | 1.00    |
| 12 months                  | 0.59                           | 0.93    | 0.61                           | 0.83    | 0.63                           | 1.16    |
| <b>ACP Actions</b>         |                                |         |                                |         |                                |         |
| 1 week                     | 0.24                           | 0.56    | 0.26                           | 0.55    | 0.24                           | 0.57    |
| 3 months                   | 0.37                           | 0.79    | 0.30                           | 0.74    | 0.47                           | 0.86    |
| 6 months                   | 0.47                           | 0.90    | 0.43                           | 0.90    | 0.54                           | 0.90    |
| 12 months                  | 0.61                           | 1.09    | 0.55                           | 1.04    | 0.74                           | 1.18    |

25  
 26 \*Clinically meaningful effect sizes were calculated from changes from baseline (i.e., mean PREAPRE scores minus mean AD-only  
 27 scores divided by pooled baseline standard deviations) and are based on standardized criteria (i.e., 0.20-0.49 small, 0.50-0.79  
 28 medium, and  $\geq 0.80$  large).<sup>2</sup>

29 **eTable 4: Ease-of-use and Satisfaction Between Study Arms and by English- and Spanish-speakers\***

|                 | All Participants, n=986 |           |         | English-speakers, n=541 |           |         | Spanish-speakers, n=445 |           |         |
|-----------------|-------------------------|-----------|---------|-------------------------|-----------|---------|-------------------------|-----------|---------|
|                 | AD-only                 | PREPARE   | p-value | AD-only                 | PREPARE   | p-value | AD-only                 | PREPARE   | p-value |
| Ease of use     | 8.0 (2.2)               | 8.1 (2.0) | 0.46    | 8.5 (1.8)               | 8.7 (1.7) | 0.31    | 7.3 (2.4)               | 7.5 (2.1) | 0.72    |
| Satisfaction    |                         |           |         |                         |           |         |                         |           |         |
| Comfort viewing | 4.0 (0.9)               | 4.1 (0.8) | 0.37    | 4.3 (0.9)               | 4.4 (0.8) | 0.95    | 3.7 (0.9)               | 3.8 (0.6) | 0.09    |
| Helpfulness     | 4.2 (0.8)               | 4.4 (0.7) | <0.001  | 4.4 (0.8)               | 4.5 (0.7) | 0.11    | 3.9 (0.7)               | 4.2 (0.6) | <0.001  |
| Recommend       | 4.1 (0.8)               | 4.2 (0.8) | 0.36    | 4.3 (0.9)               | 4.3 (0.9) | 0.72    | 4.0 (0.7)               | 4.1 (0.7) | 0.26    |

30

31 \*Ease-of-use was measured on a 1 (very hard) to 10 (very easy) point scale. Satisfaction was measured by, “How comfortable were  
 32 you viewing this guide?”; helpfulness: “How helpful was this guide?”; and recommendations: “How likely are you to recommend this  
 33 guide to others?” assessed on a 5-point Likert scale (not-at-all to extremely) from our prior work.<sup>1</sup> The p-value significance level was  
 34 Bonferroni adjusted for this secondary outcome at < 0.025.

35

36

37 **eTable 5: Depression and Anxiety Scores Between Study Arms and by English- and Spanish-speakers**

|                         | <b>All Participants, n=986</b><br>mean (95% confidence interval) |               |         | <b>English-speakers, n=541</b><br>mean (95% confidence interval) |               |         | <b>Spanish-speakers, n=445</b><br>mean (95% confidence interval) |               |         |
|-------------------------|------------------------------------------------------------------|---------------|---------|------------------------------------------------------------------|---------------|---------|------------------------------------------------------------------|---------------|---------|
|                         | AD-only                                                          | PREPARE       | p-value | AD-only                                                          | PREPARE       | p-value | AD-only                                                          | PREPARE       | p-value |
| Depression Score (0-24) | 4.3 (3.9-4.7)                                                    | 4.2 (3.8-4.6) | 0.69    | 4.1(3.6-4.6)                                                     | 4.4 (3.9-5.0) | 0.35    | 4.5(4.0-5.1)                                                     | 3.9 (3.3-4.4) | 0.10    |
| Anxiety Score (0-21)    | 3.4 (3.1-3.8)                                                    | 3.2 (2.9-3.5) | 0.32    | 3.2(2.8-3.7)                                                     | 3.4 (2.9-3.8) | 0.70    | 3.7(3.2-4.2)                                                     | 3.0 (2.5-3.5) | 0.05    |

38  
 39 \*Adjusted for baseline depression and anxiety scores. Adjusted mean and 95% confidence interval (CI). Depression was measured  
 40 using the validated Patient Health Questionnaire (PHQ)-8 (scores 0-24) and anxiety was measured with the Generalized Anxiety  
 41 Disorder (GAD)-7 (scores 0-21).<sup>3</sup> Scores less than 5 represent no clinically meaningful anxiety or depression and scores of 5, 10, 15,  
 42 and 20 represent mild, moderate, moderately severe and severe depression or anxiety, respectively.<sup>4,5</sup> The p-value significance level  
 43 was set at < 0.05.  
 44

45  
 46  
 47  
 48  
 49  
 50

51 **Online-Only References:**

- 52 1. Sudore RL, Barnes DE, Le GM, et al. Improving advance care planning for English-  
53 speaking and Spanish-speaking older adults: study protocol for the PREPARE  
54 randomised controlled trial. *BMJ open*. 2016;6(7):e011705.
- 55 2. Cohen J. *Statistical power analysis for the behavioral sciences (2nd ed.)*. Hillsdale, NJ::  
56 Lawrence Earlbaum Associates.; 1988.
- 57 3. Lowe B, Wahl I, Rose M, et al. A 4-item measure of depression and anxiety: validation  
58 and standardization of the Patient Health Questionnaire-4 (PHQ-4) in the general  
59 population. *J Affect Disord*. 2010;122(1-2):86-95.
- 60 4. Kroenke K, Strine TW, Spitzer RL, Williams JB, Berry JT, Mokdad AH. The PHQ-8 as a  
61 measure of current depression in the general population. *J Affect Disord*. 2009;114(1-  
62 3):163-173.
- 63 5. Spitzer RL, Kroenke K, Williams JB, Lowe B. A brief measure for assessing generalized  
64 anxiety disorder: the GAD-7. *Arch Intern Med*. 2006;166(10):1092-1097.

65
